# Supplementary material
Source: PubMed Central journal article supplement (PMC4634050)
Supplement: supp_pp.15.00552_PP2015-00552R1_Supplemental_Tables.pdf [file supp_pp.15.00552_PP2015-00552R1_Supplemental_Tables.pdf]

## Supplemental Tables

**Supplemental Table S1.** PAR1-interacting bHLH proteins identified in the Y2H screen.

| AGI       | Name                                   | Family <sup>(1)</sup> | # Clones <sup>(2)</sup> | Category <sup>(3)</sup> |
|-----------|----------------------------------------|-----------------------|-------------------------|-------------------------|
| At1g73830 | BHLH050 (BEE3)                         | XII                   | 26                      | A                       |
| At2g42300 | BHLH048                                | XII                   | 15                      | A                       |
| At3g57800 | BHLH060                                | XII                   | 6                       | A                       |
| At4g36540 | BHLH058 (BEE2)                         | XII                   | 6                       | A                       |
| At5g48560 | BHLH078                                | XII                   | 16                      | A                       |
| At3g24140 | BHLH097 (FAMA)                         | I                     | 3                       | B                       |
| At5g53210 | BHLH098 (SPEECHLESS)                   | I                     | 7                       | B                       |
| At1g02340 | BHLH026 (HFR1)                         | VII                   | 4                       | B                       |
| At4g29100 | BHLH068                                | X                     | 4                       | B                       |
| At1g03040 | BHLH007                                | XI                    | 4                       | B                       |
| At4g30980 | BHLH069                                | XI                    | 6                       | B                       |
| At1g10120 | BHLH074                                | XII                   | 7                       | B                       |
| At1g18400 | BHLH044 (BEE1)                         | XII                   | 8                       | B                       |
| At1g62975 | BHLH125                                | I                     | 4                       | D                       |
| At1g12860 | BHLH033                                | III                   | 1                       | D                       |
| At2g28160 | BHLH029 (FIT/FRU)                      | III                   | 3                       | D                       |
| At5g57150 | BHLH035                                | III                   | 1                       | D                       |
| At3g59060 | BHLH065 (PIF5/PIL6) <sup>(4) (5)</sup> | VII                   | 2                       | D                       |
| At4g33880 | BHLH085                                | VIII                  | 1                       | D                       |
| At4g09180 | BHLH081                                | IX                    | 1                       | D                       |
| At3g20640 | BHLH123 (NAN)                          | X                     | 1                       | D                       |
| At2g18300 | BHLH064                                | XII                   | 2                       | D                       |
| At3g07340 | BHLH062                                | XII                   | 1                       | D                       |
| At1g05805 | BHLH128                                | IX                    | 3                       | N/A                     |
| At1g35460 | BHLH080                                | IX                    | 3                       | N/A                     |
| At1g68920 | BHLH049                                | XII                   | 1                       | N/A                     |
| At3g23690 | BHLH077                                | XII                   | 7                       | N/A                     |
| At5g62610 | BHLH079                                | XII                   | 1                       | N/A                     |

(1) According to Heim et al., 2003.

(2) Number of positive clones (with a complete or a partial sequence) identified in the screen.

(3) Hybrigenics Global PBS Category:

A, Very high confidence in the interaction

B, High confidence in the interaction

D, Moderate confidence in the interaction

N/A, PBS score cannot be attributed

(4) Found to interact with HFR1 in this work.

(5) Found to interact with HFR1 by Hornitschek et al., 2009.

**Supplemental Table S2.** HFR1-interacting bHLH proteins identified in the Y2H screen.

| AGI       | Name                               | Family <sup>(1)</sup> | # Clones <sup>(2)</sup> | Category <sup>(3)</sup> |
|-----------|------------------------------------|-----------------------|-------------------------|-------------------------|
| At1g09530 | BHLH008 (PIF3)                     | VII                   | 1                       | N/A                     |
| At2g20180 | BHLH015 (PIF1/PIL5) <sup>(4)</sup> | VII                   | 14                      | A                       |
| At2g43010 | BHLH009 (PIF4) <sup>(5)</sup>      | VII                   | 19                      | A                       |
| At3g59060 | BHLH065 (PIF5/PIL6) <sup>(4)</sup> | VII                   | 146                     | A                       |
| At3g62090 | BHLH132 (PIF6/PIL2)                | VII                   | 2                       | D                       |
| At4g00050 | BHLH016 (PIF8/UNE10)               | VII                   | 24                      | A                       |

(1) According to Heim et al., 2003.

(2) Number of positive clones (with a complete or a partial sequence) identified in the screen.

(3) Hybrigenics Global PBS Category (see Table S1).

(4) Found to interact with PAR1 in this work.

(5) Found to interact with PAR1 by Hao et al., 2012.

**Supplemental Table S3.** Primers used in this work for qPCR analyses.

| Gene                         | Primer | Sequence                        |
|------------------------------|--------|---------------------------------|
| At5g17230<br>( <i>PSY</i> )  | TO34   | GAC ACC CGA AAG GCG AAA GG      |
|                              | TO35   | CAG CGA GAG CAG CAT CAA GC      |
| At5g11260<br>( <i>HY5</i> )  | MOH5F  | CAA GCA GCG AGA GGT CAT CA      |
|                              | MOH5R  | CAT CGC TTT CAA TTC CTT CTT TG  |
| At2g42870<br>( <i>PAR1</i> ) | BO109  | CAC CGT CAT GCT CAG CCA         |
|                              | BO110  | TCG GTC TTC ACG TAC GCT TG      |
| At1g02340<br>( <i>HFR1</i> ) | BO89   | GAT GCG TAA GCT ACA GCA ACT CGT |
|                              | BO90   | AGA ACC GAA ACC TTG TCC GTC TT  |
| At5g25760<br>( <i>UBC</i> )  | TO42   | CTG CTT GGA CGC TTC AGT CTG     |
|                              | TO43   | CGC AGT TAA GAG GAC TGT CC      |
